# Supplementary material for: Partial oxidation of ethylbenzene by H2O2 on VOx/HZSM-22 catalyst
Source: Royal Society of Chemistry journal article supplement (doi:10.1039/c6ra05906f), 2016-01-01
Supplement: c6ra05906f1.pdf [file c6ra05906f1.pdf]

Journal Name

ARTICLE

## Supplementary information for Partial oxidation of ethylbenzene by $\text{H}_2\text{O}_2$ on $\text{VO}_x/\text{HZSM-22}$ catalyst

Li Luo, Huan Liu, Guiying Li\* and Changwei Hu\*

Key Laboratory of Green Chemistry and Technology, Ministry of Education, College of Chemistry, Sichuan University, Chengdu, Sichuan, 610064, China.

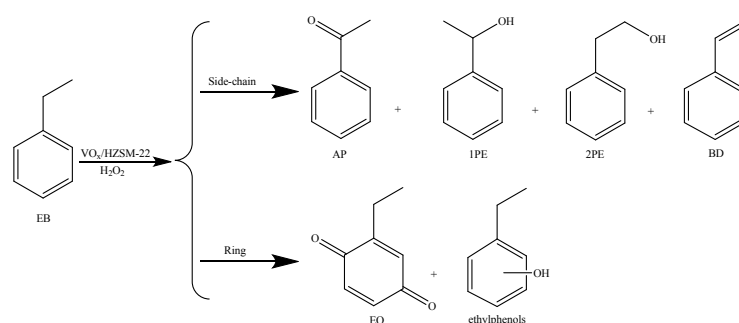

**Scheme S1** The reaction scheme of partial oxidation of ethylbenzene

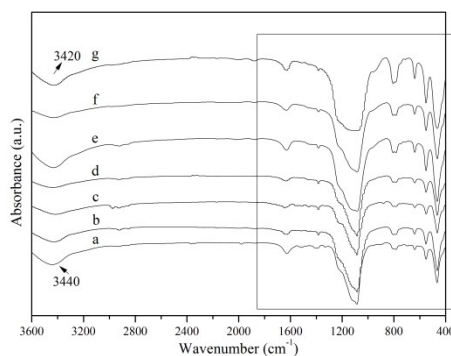

**Fig. S1** FTIR spectra of samples with different vanadium content: a-HZSM-22, b-0.09 wt%  $\text{VO}_x/\text{HZSM-22}$ , c-0.36 wt%  $\text{VO}_x/\text{HZSM-22}$ , d-0.71 wt%  $\text{VO}_x/\text{HZSM-22}$ , e-0.96 wt%  $\text{VO}_x/\text{HZSM-22}$ , f-1.81 wt%  $\text{VO}_x/\text{HZSM-22}$ , g-2.86 wt%  $\text{VO}_x/\text{HZSM-22}$ .

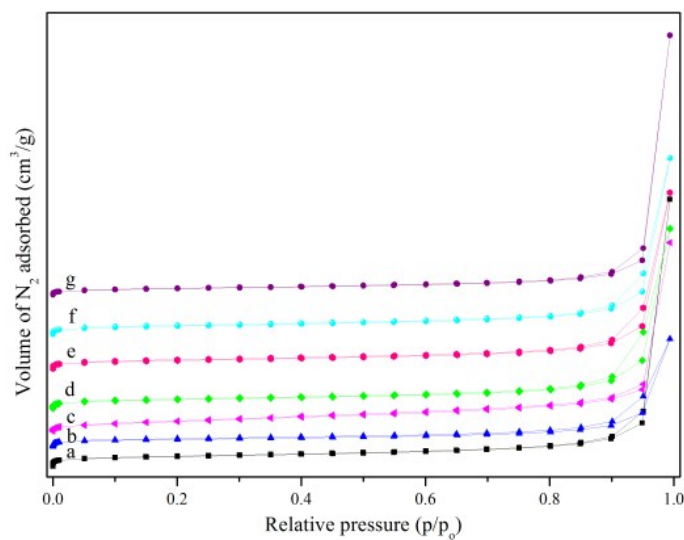

**Fig. S2**  $N_2$  adsorption-desorption isotherms: a-HZSM-22, b-0.09 wt%  $VO_x$ /HZSM-22, c-0.36 wt%  $VO_x$ /HZSM-22, d-0.71 wt%  $VO_x$ /HZSM-22, e-0.96 wt%  $VO_x$ /HZSM-22, f-1.81 wt%  $VO_x$ /HZSM-22, g-2.86 wt%  $VO_x$ /HZSM-22.

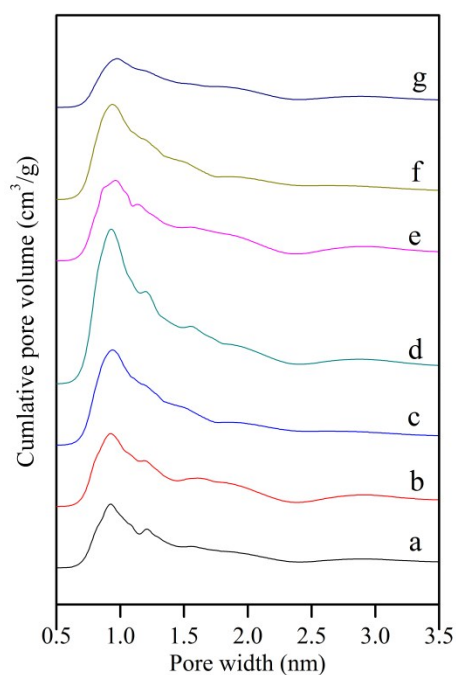

**Fig. S3** Pore size distributions calculated by Saito-Foley Method: a-HZSM-22, b-0.09 wt%  $VO_x$ /HZSM-22, c-0.36 wt%  $VO_x$ /HZSM-22, d-0.71 wt%  $VO_x$ /HZSM-22, e-0.96 wt%  $VO_x$ /HZSM-22, f-1.81 wt%  $VO_x$ /HZSM-22, g-2.86 wt%  $VO_x$ /HZSM-22.

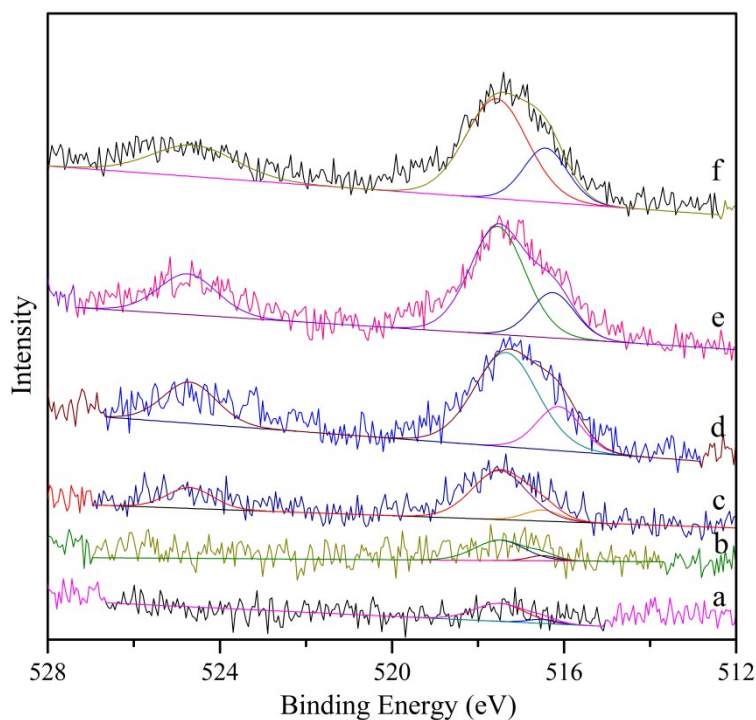

**Fig. S4** The XPS spectra of V on the V/HZSM-22 with different vanadium content: a-0.09 wt% VO<sub>x</sub>/HZSM-22, b-0.36 wt% VO<sub>x</sub>/HZSM-22, c-0.71 wt% VO<sub>x</sub>/HZSM-22, d-0.96 wt% VO<sub>x</sub>/HZSM-22, e-1.81 wt% VO<sub>x</sub>/HZSM-22, f-2.86 wt% VO<sub>x</sub>/HZSM-22.

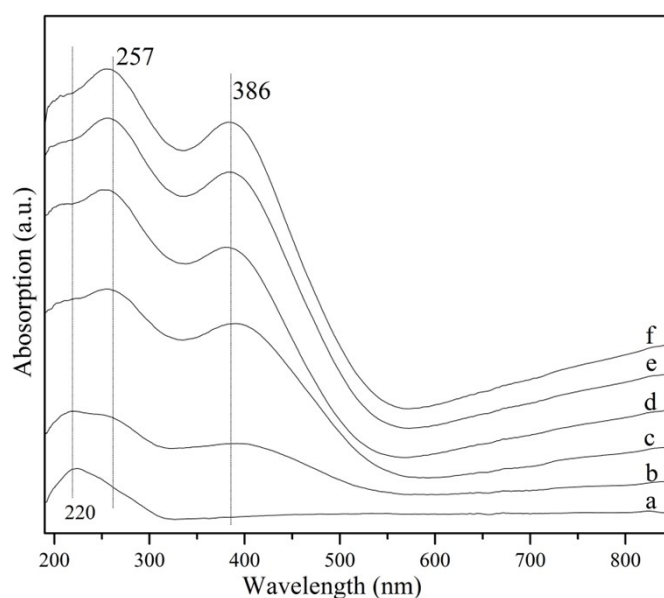

**Fig. S5** DR UV-vis spectra of all the samples: a-0.09 wt% VO<sub>x</sub>/HZSM-22, b-0.36 wt% VO<sub>x</sub>/HZSM-22, c-0.71 wt% VO<sub>x</sub>/HZSM-22, d-0.96 wt% VO<sub>x</sub>/HZSM-22, e-1.81 wt% VO<sub>x</sub>/HZSM-22, f-2.86 wt% VO<sub>x</sub>/HZSM-22.

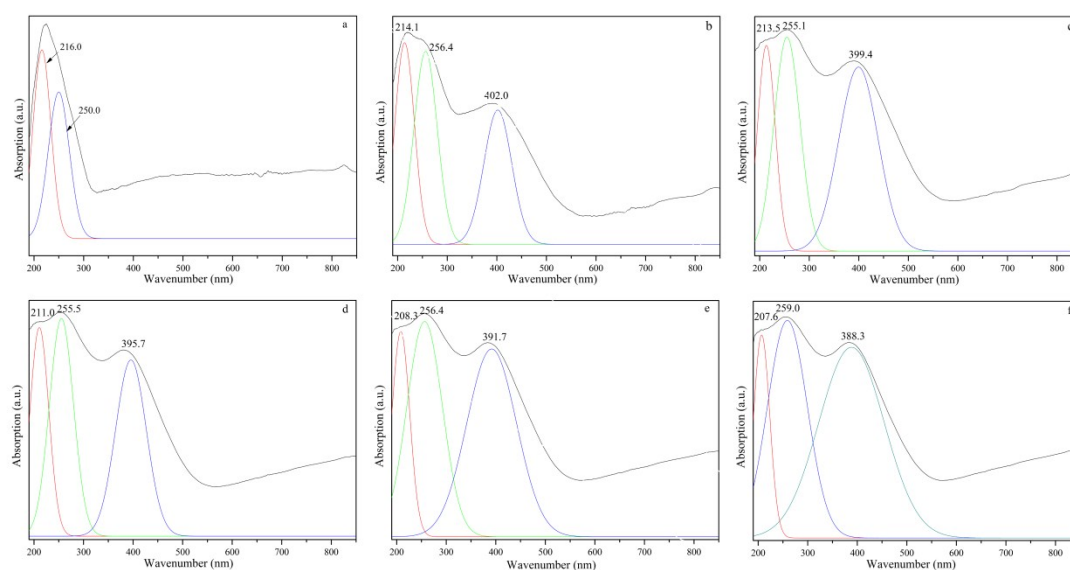

**Fig. S6** DR UV-vis spectra of deconvolution to sub-bands: a-0.09 wt% VO<sub>x</sub>/HZSM-22, b-0.36 wt% VO<sub>x</sub>/HZSM-22, c-0.71 wt% VO<sub>x</sub>/HZSM-22, d-0.96 wt% VO<sub>x</sub>/HZSM-22, e-1.81 wt% VO<sub>x</sub>/HZSM-22, f-2.86 wt% VO<sub>x</sub>/HZSM-22.

**Table S1** Recyclability of the used catalysts

| Catalyst                                      | Conv. (%) | S <sub>AP</sub> (%) | S <sub>Side-chain</sub> (%) | S <sub>ring</sub> (%) | Y <sub>AP</sub> (%) | Y <sub>BD</sub> (%) | Y <sub>1PE</sub> (%) | Y <sub>EQ</sub> (%) | Y <sub>ethylphenols</sub> (%) |
|-----------------------------------------------|-----------|---------------------|-----------------------------|-----------------------|---------------------|---------------------|----------------------|---------------------|-------------------------------|
| Fresh catalyst                                | 24.4      | 71.7                | 92.6                        | 7.4                   | 17.5                | 2.3                 | 2.7                  | 0.1                 | 1.7                           |
| Second circle.                                | 1.1       | 48.4                | 73.4                        | 26.6                  | 0.5                 | 0.1                 | 0.1                  | 0.0                 | 0.4                           |
| Third circle                                  | 0.1       | 0                   | 0                           | 100.0                 | 0.0                 | 0.0                 | 0.0                  | 0.0                 | 0.1                           |
| Regenerated catalyst                          | 2.8       | 54.1                | 82.7                        | 17.3                  | 1.5                 | 0.3                 | 0.5                  | 0.0                 | 0.5                           |
| Used catalyst(H <sub>2</sub> O <sub>2</sub> ) | 2.2       | 14.3                | 24.1                        | 75.9                  | 0.3                 | 0.1                 | 0.1                  | 0.0                 | 1.7                           |
| Used catalyst(CH <sub>3</sub> CN)             | 17.0      | 74.1                | 93.5                        | 6.5                   | 12.6                | 1.6                 | 1.6                  | 0.2                 | 0.9                           |
| Solvent(H <sub>2</sub> O <sub>2</sub> )       | 2.1       | 32.2                | 48.0                        | 52.0                  | 0.7                 | 0.2                 | 0.1                  | 0.0                 | 1.1                           |

Reaction condition: 200 mg 1.81 wt% VO<sub>x</sub>/HZSM-22, 70 °C, 4 h, 49.9 mmol 30 wt% H<sub>2</sub>O<sub>2</sub>, 8.2 mmol ethylbenzene, 10 ml acetonitrile
